# Supplementary material for: Identifying Novel Cell Glycolysis‐Related Gene Signature Predictive of Overall Survival in Gastric Cancer
Source: Hindawi journal article supplement (doi:10.1155/2021/9656947), 2021-01-01

**A**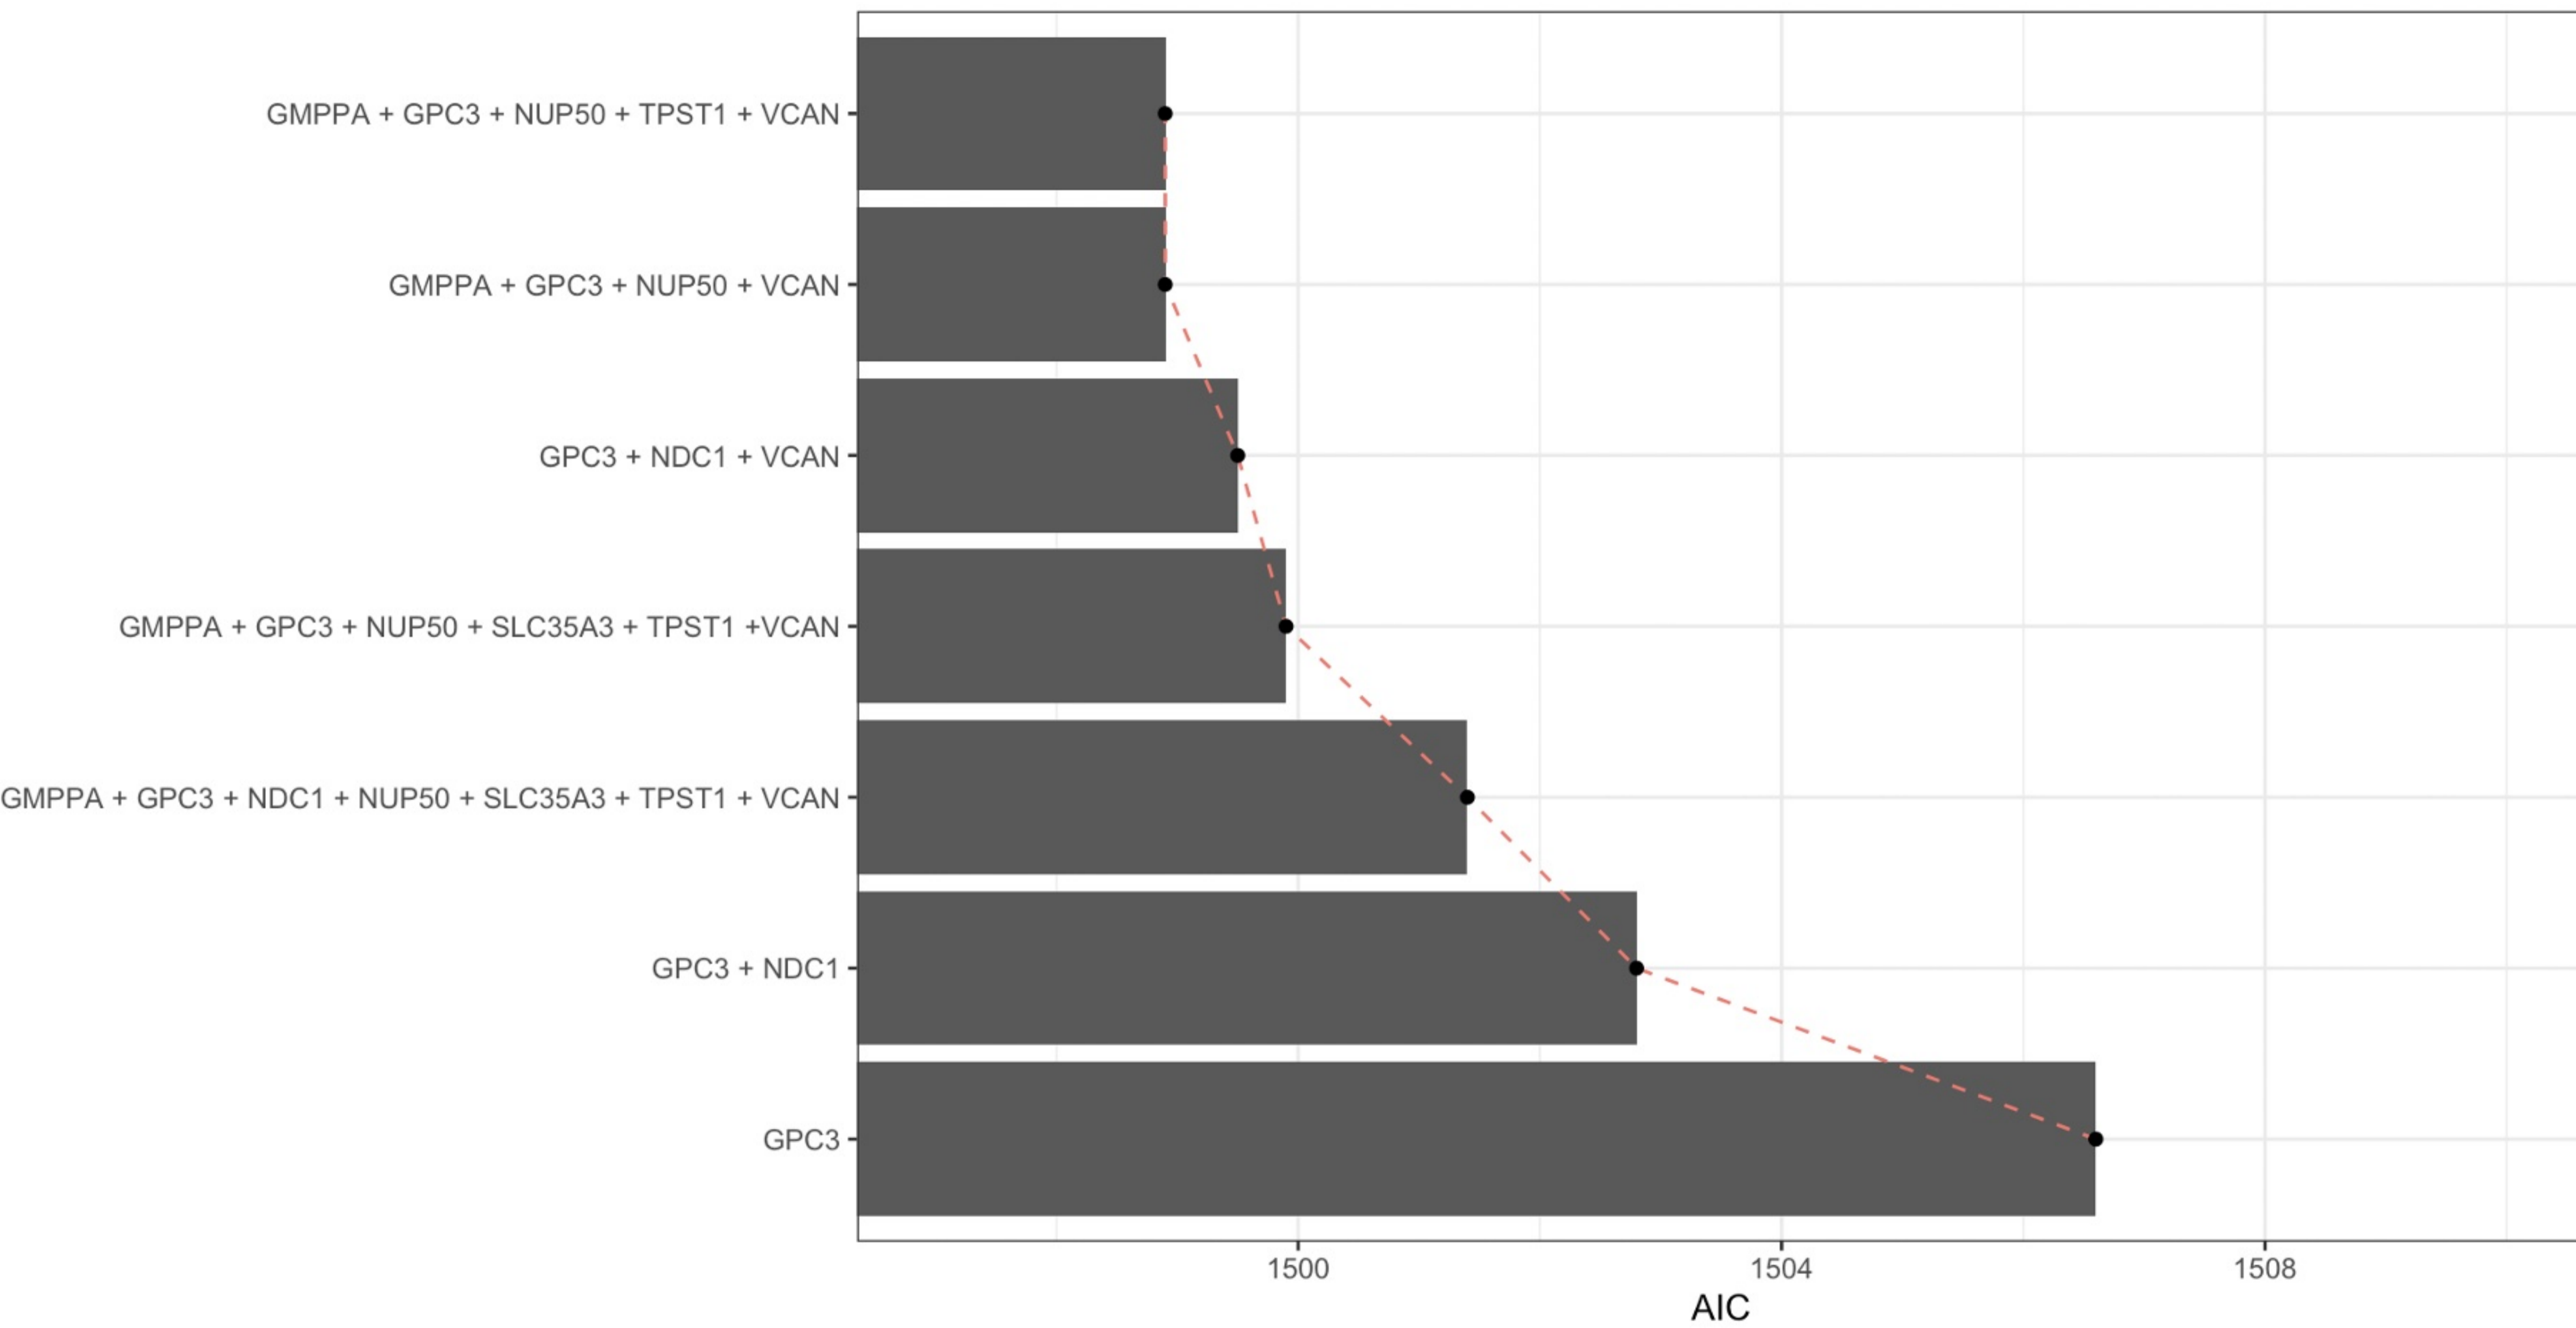**B**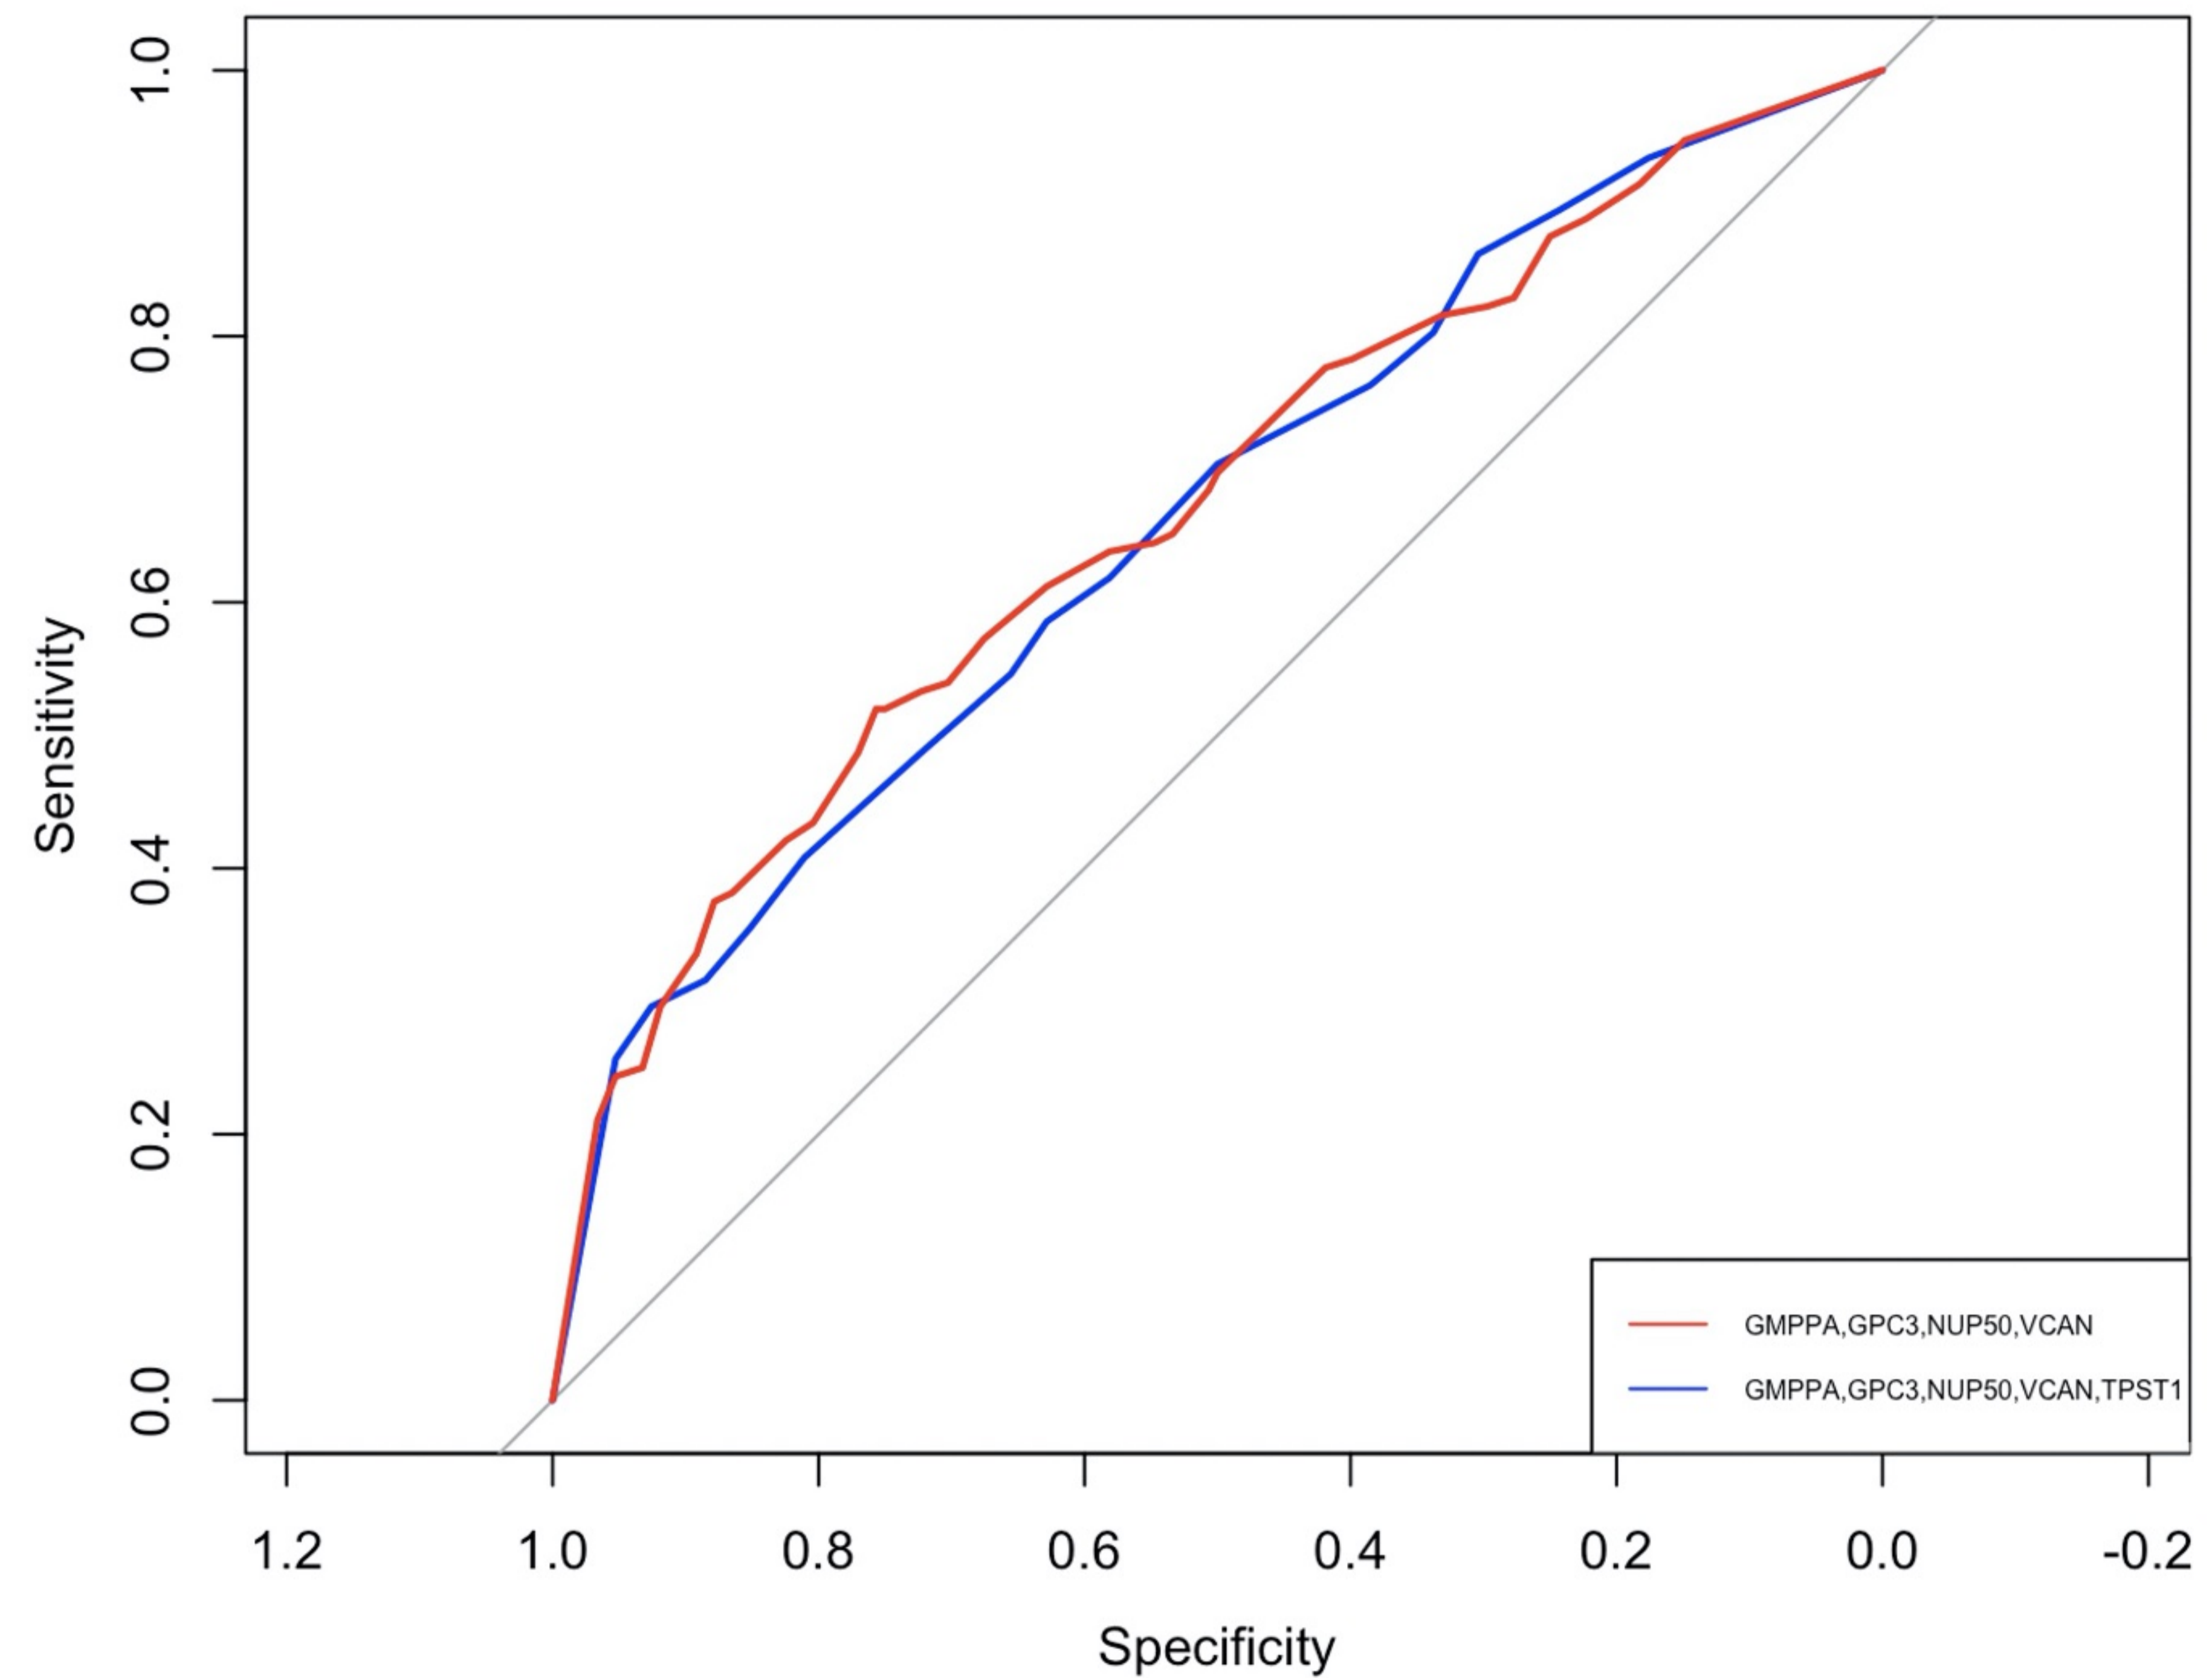

Supplement: f1 [file 9656947.f1.pdf]
