# Supplementary material for: Identifying Novel Cell Glycolysis‐Related Gene Signature Predictive of Overall Survival in Gastric Cancer
Source: Hindawi journal article supplement (doi:10.1155/2021/9656947), 2021-01-01

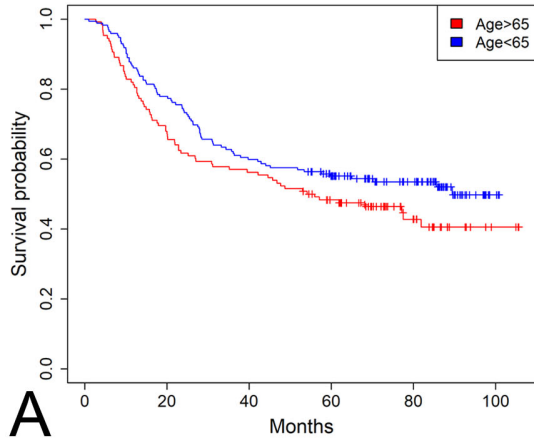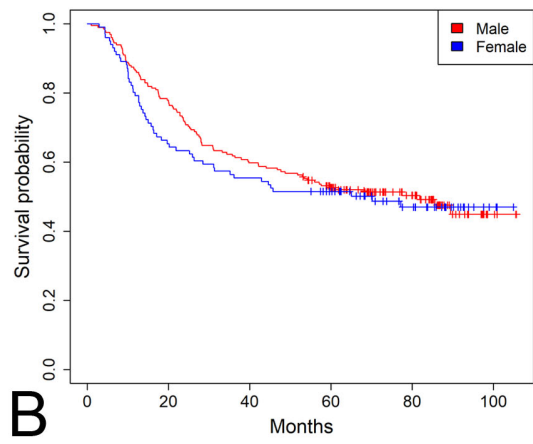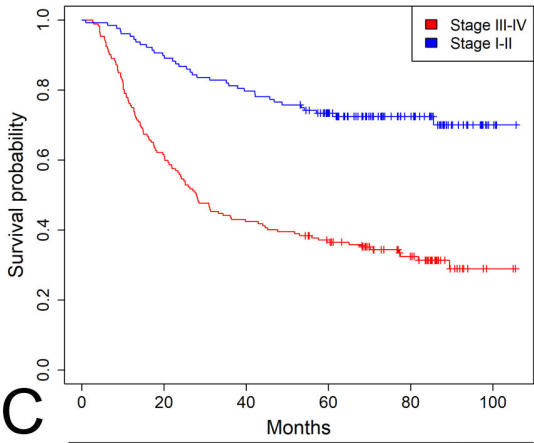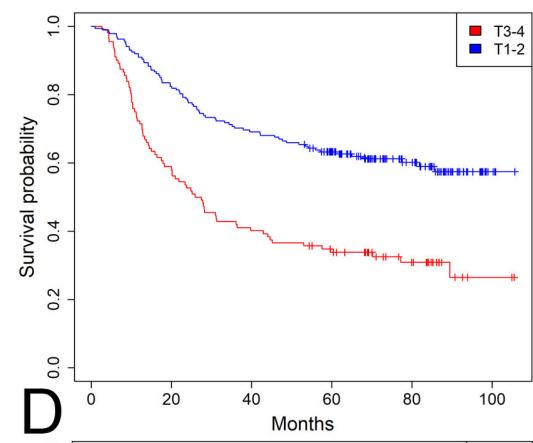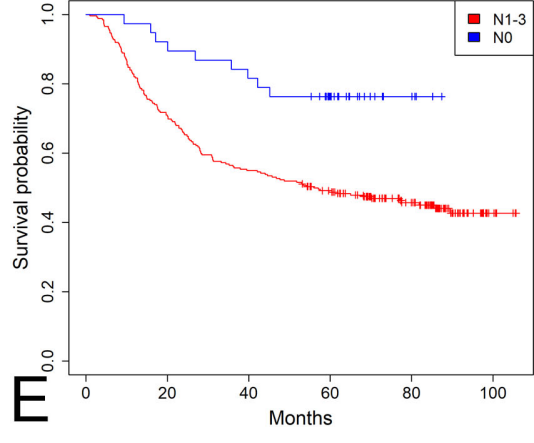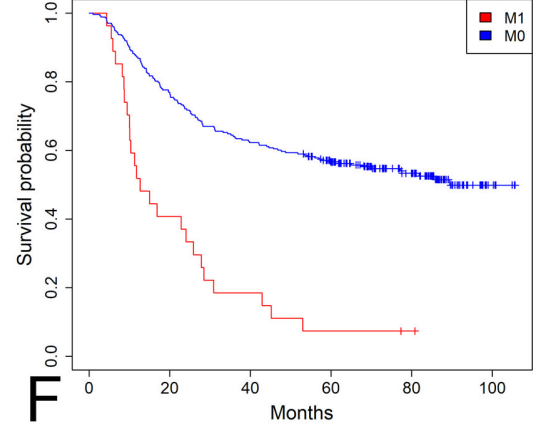

Supplement: f2 [file 9656947.f2.pdf]
