# Supplementary material for: Identifying Novel Cell Glycolysis‐Related Gene Signature Predictive of Overall Survival in Gastric Cancer
Source: Hindawi journal article supplement (doi:10.1155/2021/9656947), 2021-01-01
Supplement: f3 [file 9656947.f3.pdf]

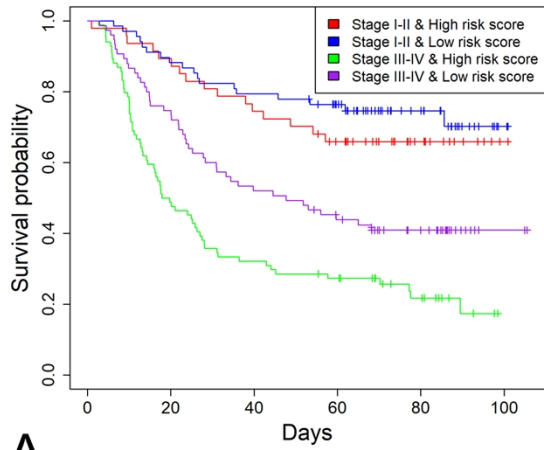

**A**

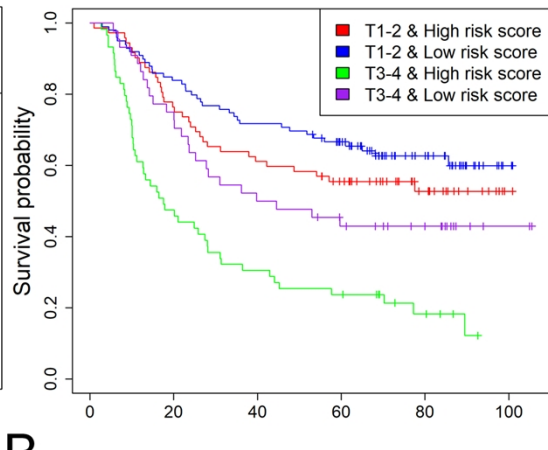

**B**

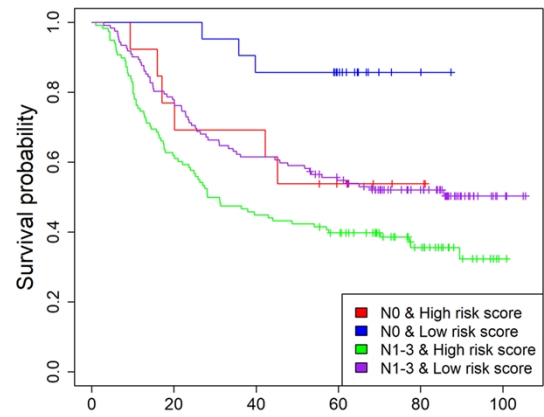

**C**

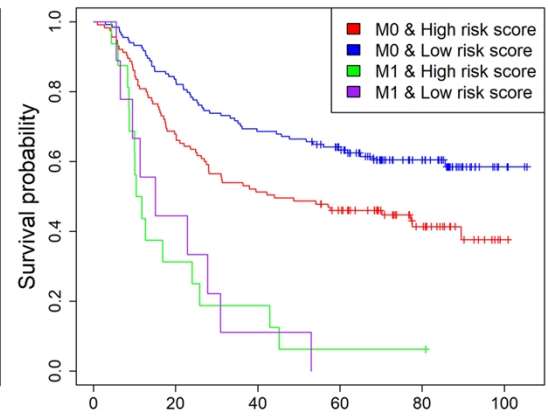

**D**
